# Supplementary material for: Prediction of luciferase inhibitors by the high-performance MIEC-GBDT approach based on interaction energetic patterns
Source: Royal Society of Chemistry journal article supplement (doi:10.1039/c6cp08232g), 2017-01-01
Supplement: c6cp08232g1.pdf [file c6cp08232g1.pdf]

## Supporting Information

**Table S1.** Averaged energetic contributions of the most important 10 residues with the highest Times values.

| MIEC matrix | Energy term | Inhibitors | Non-inhibitors | Times* | MIEC matrix | Energy term | Inhibitors | Non-inhibitors | Times* |
|-------------|-------------|------------|----------------|--------|-------------|-------------|------------|----------------|--------|
| (I)         | PRO318      | -0.29      | -1.13          | 3.90   | (II)        | PHE247-vdW  | -3.33      | -1.67          | 2.00   |
|             | THR251      | -0.86      | -0.36          | 2.36   |             | ALA348-vdW  | -1.54      | -0.73          | 2.10   |
|             | HIS245      | -0.62      | -0.67          | 1.08   |             | HIS245-SA   | -0.11      | -0.18          | 1.56   |
|             | ARG437      | -0.26      | -1.31          | 4.98   |             | GLY316-SA   | -0.12      | -0.24          | 1.94   |
|             | PHE247      | -3.30      | -1.75          | 1.89   |             | ARG437-SA   | -0.04      | -0.19          | 4.39   |
|             | THR343      | -0.82      | -1.02          | 1.24   |             | THR343-SA   | -0.04      | -0.05          | 1.20   |
|             | VAL362      | -0.11      | -0.23          | 2.08   |             | PRO318-vdW  | -0.32      | -1.12          | 3.53   |
|             | ASP422      | 0.38       | 0.94           | 2.46   |             | GLY315-SA   | -0.03      | -0.03          | 1.18   |
|             | GLY246      | -0.56      | -0.37          | 1.50   |             | PRO318-ele  | 0.07       | 0.14           | 1.89   |
|             | GLY316      | -0.64      | -0.94          | 1.48   |             | LEU342-SA   | -0.11      | -0.18          | 1.72   |
| (III)       | ILE434      | -0.18      | -0.58          | 3.19   | (IV)        | PHE247-vdW  | -3.35      | -1.70          | 1.97   |
|             | PRO318      | -0.31      | -1.15          | 3.75   |             | ARG437-vdW  | -0.25      | -1.23          | 4.99   |
|             | THR251      | -0.85      | -0.36          | 2.37   |             | GLY316-SA   | -0.12      | -0.24          | 1.95   |
|             | HIS245      | -0.62      | -0.64          | 1.03   |             | ARG437-SA   | -0.04      | -0.19          | 4.59   |
|             | SER198      | -0.01      | -0.27          | 25.69  |             | SER420-vdW  | -0.04      | -0.16          | 3.61   |
|             | ARG437      | -0.29      | -1.33          | 4.60   |             | ALA348-vdW  | -1.55      | -0.75          | 2.06   |
|             | SER420      | -0.03      | -0.11          | 3.70   |             | HIS245-SA   | -0.12      | -0.18          | 1.55   |
|             | THR343      | -0.83      | -1.09          | 1.32   |             | LEU342-SA   | -0.10      | -0.18          | 1.73   |
|             | ARG218      | -0.29      | -0.32          | 1.11   |             | GLY246-vdW  | -0.74      | -0.45          | 1.65   |
|             | ALA348      | -1.55      | -0.76          | 2.04   |             | ILE351-GB   | -0.11      | -0.06          | 1.77   |
| (V)         | ILE423      | -0.01      | -0.03          | 6.48   | (VI)        | GLY421-vdW  | -0.01      | -0.06          | 3.75   |
|             | THR343      | -0.82      | -1.06          | 1.29   |             | ASP436-vdW  | -0.03      | -0.15          | 4.94   |
|             | LEU438      | 0.02       | 0.06           | 3.95   |             | PHE247-vdW  | -3.32      | -1.68          | 1.98   |
|             | SER198      | 0.003      | -0.29          | -76.5  |             | ALA348-vdW  | -1.53      | -0.74          | 2.07   |
|             | VAL288      | -0.03      | -0.09          | 3.42   |             | GLY316-SA   | -0.12      | -0.24          | 1.94   |
|             | ASN197      | 0.03       | 0.01           | 4.69   |             | HIS245-SA   | -0.11      | -0.18          | 1.57   |
|             | ALA348      | -1.55      | -0.76          | 2.04   |             | ILE349-vdW  | -0.12      | -0.09          | 1.35   |
|             | PRO289      | -0.02      | -0.06          | 4.08   |             | LEU342-SA   | -0.11      | -0.18          | 1.70   |
|             | ASP436      | 0.004      | -0.02          | -5.23  |             | SER198-SA   | -0.02      | -0.08          | 3.37   |
|             | PRO318      | -0.28      | -1.13          | 3.97   |             | THR345-vdW  | -0.15      | -0.13          | 1.17   |

\* Times = the maximum value of Inhibitors/Non-inhibitors and Non-inhibitors/Inhibitors

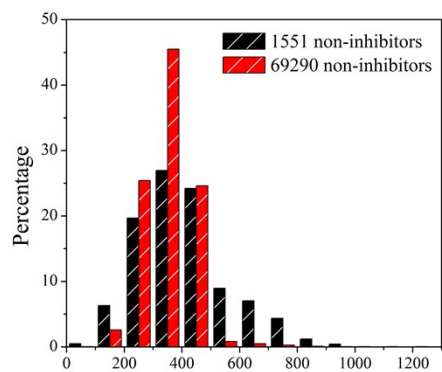

(a) MW

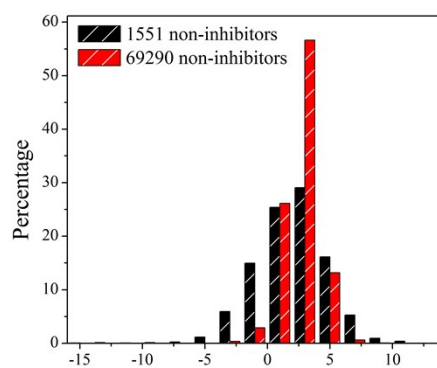

(b) AlogP

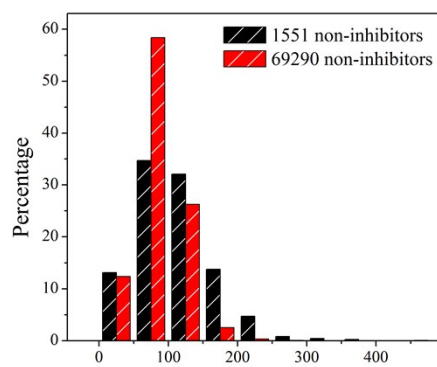

(c) PSA

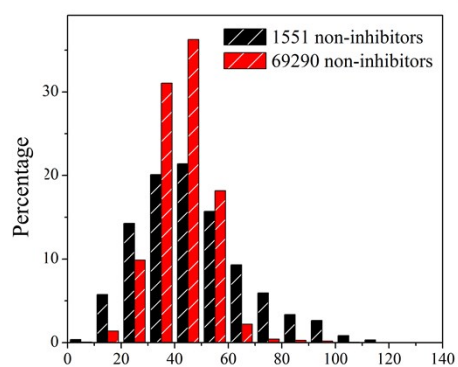

(d) Polar

**Figure S1.** Distributions of (a) molecular weight (MW), (b) AlogP, (c) polar surface area (PSA) and (d) molecular polarizability (Polar) for the selected non-inhibitors and non-inhibitors in the whole dataset.

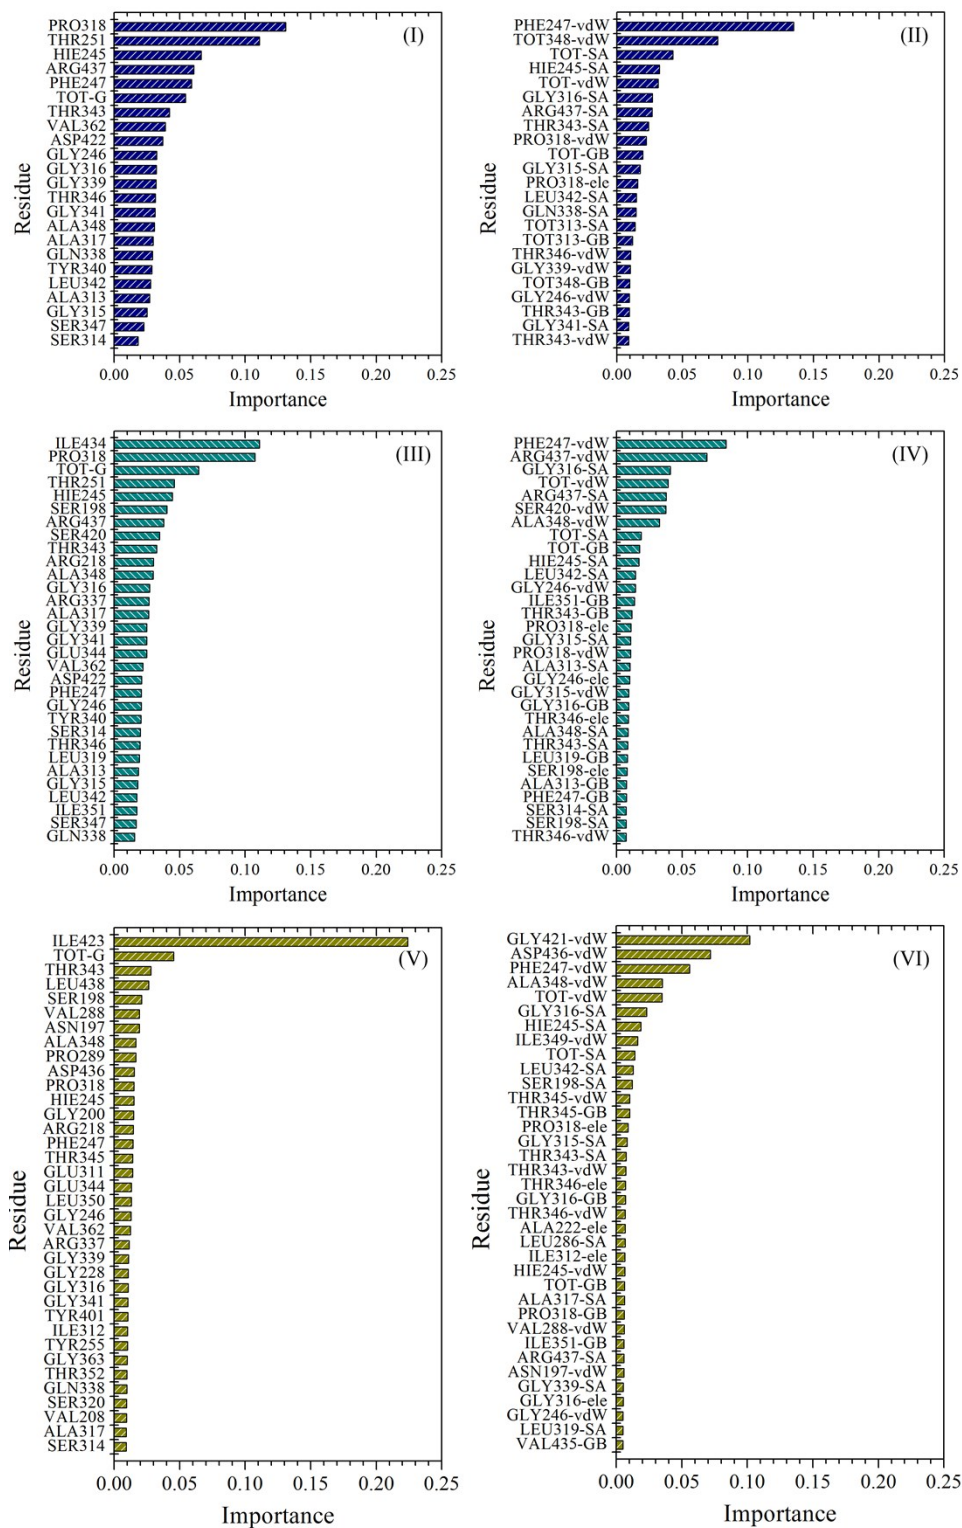

**Figure S2.** The most important components for each MIEC matrix given by the GBDT algorithm.

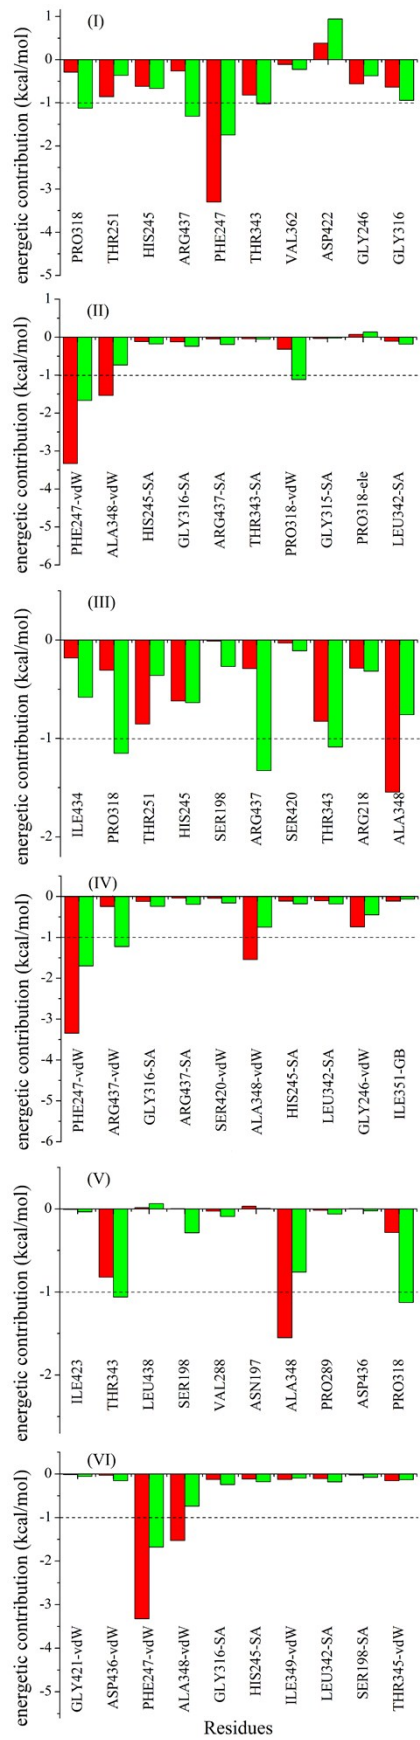

**Figure S3.** The difference of the energetic contributions of the inhibitors (red) and those of the non-inhibitors (green) for the important residues.
